# Supplementary material for: Meeting Vitamin D Requirements in White Caucasians at UK Latitudes: Providing a Choice
Source: MDPI journal article supplement (doi:10.3390/nu10040497), 2018-04-17
Supplement: s1 [file s1]

## Webb et al. Supplementary Information

### Data Availability:

The underlying modelled climatology data and their validation against ground-based data have been previously published [reference 15]. The model, all model input data, and the data against which the model was validated are freely available online from international geophysical data centres.

The model itself is available at <http://www.libradtran.org>

The input data are available from:

<https://ozoneaq.gsfc.nasa.gov/data/toms/> (TOMS ozone)

<https://disc.sci.gsfc.nasa.gov/Aura/data-holdings/OMI> (OMI ozone)

<http://modis.gsfc.nasa.gov> (Cloud cover and optical depth; Aerosol optical depth)

<http://www.temis.nl/data/topo/dem2grid.html> (Digital elevation data)

The measured ground-based data used for validation are available at <http://www.woudc.org>

The full *in vivo* human data set is available from Professor L.E. Rhodes.

The data for circulating 25OHD by month in a white Caucasian adult population was previously published [reference 8, Figure 1].

The change in circulating 25OHD after a 6 week course of simulated sunlight exposures has been previously published [reference 14, Figure 1].

**Raw data used for regression of February on September 25OHD levels for healthy white Caucasian adults is given below.**

| id  | diagnosis | photosen | sep25ohd | feb25ohd |
|-----|-----------|----------|----------|----------|
| 121 | Healthy   | 0        | 34.2     | 21.8     |
| 122 | Healthy   | 0        | 19.9     | 14.1     |
| 123 | Healthy   | 0        | 19.4     | 21       |
| 124 | Healthy   | 0        | 16.8     | 7.5      |
| 125 | Healthy   | 0        | 52.9     | 38.3     |
| 126 | Healthy   | 0        | 13.7     | 8.9      |
| 127 | Healthy   | 0        | 28.7     | 16.2     |
| 128 | Healthy   | 0        | 22       | 13.1     |
| 129 | Healthy   | 0        | 25.5     | 11.2     |
| 130 | Healthy   | 0        | 10.4     | 3.9      |
| 131 | Healthy   | 0        | 17.9     | 11.4     |
| 132 | Healthy   | 0        | 30.3     | 16.2     |

|     |         |   |      |      |
|-----|---------|---|------|------|
| 133 | Healthy | 0 | 31.7 | 18.2 |
| 134 | Healthy | 0 | 28.7 | 19.5 |
| 135 | Healthy | 0 | 15.8 | 6.1  |
| 136 | Healthy | 0 | 35.7 | 10.4 |
| 137 | Healthy | 0 | 8.1  | 4.1  |
| 138 | Healthy | 0 | 22.7 | 22   |
| 139 | Healthy | 0 | 41.7 | 35.7 |
| 140 | Healthy | 0 | 28.4 | 13.7 |
| 141 | Healthy | 0 | 27.7 | 30.4 |
| 142 | Healthy | 0 | 31.2 | 20.4 |
| 143 | Healthy | 0 | 17.7 | 15.7 |
| 145 | Healthy | 0 | 31.4 | 14.1 |
| 146 | Healthy | 0 | 29.1 | 19.6 |
| 147 | Healthy | 0 | 24.6 | 22.8 |
| 148 | Healthy | 0 | 25.7 | 21.2 |
| 150 | Healthy | 0 | 29.3 | 18.2 |
| 151 | Healthy | 0 | 17.4 | 7.5  |
| 152 | Healthy | 0 | 39.3 | 24.5 |
| 154 | Healthy | 0 | 23.5 | 20   |
| 155 | Healthy | 0 | 28.7 | 16.8 |
| 156 | Healthy | 0 |      | 22.9 |
| 157 | Healthy | 0 | 28   | 12.3 |
| 159 | Healthy | 0 | 45.6 | 42.6 |
| 160 | Healthy | 0 | 33.9 | 20.9 |
| 161 | Healthy | 0 | 22.5 | 9.5  |
| 162 | Healthy | 0 | 23   | 16.9 |
| 163 | Healthy | 0 | 51.4 | 42.9 |
| 164 | Healthy | 0 | 16.7 | 8.3  |
| 165 | Healthy | 0 | 11.7 | 4.4  |
| 166 | Healthy | 0 | 9.9  | 4.4  |
| 168 | Healthy | 0 | 38.9 | 16.9 |
| 169 | Healthy | 0 | 29.5 | 26.5 |
| 170 | Healthy | 0 | 23.4 | 10.9 |
| 171 | Healthy | 0 | 27.9 | 17.3 |
| 172 | Healthy | 0 | 5.4  |      |
| 176 | Healthy | 0 | 29.9 | 14.1 |
| 178 | Healthy | 0 | 29.8 | 14.8 |
| 179 | Healthy | 0 | 30.3 | 33   |
| 181 | Healthy | 0 | 38.4 | 22.4 |
| 182 | Healthy | 0 | 19.2 | 15.5 |
| 183 | Healthy | 0 | 30   | 20.3 |
| 184 | Healthy | 0 | 12.7 | 5.7  |
| 185 | Healthy | 0 | 19.6 | 4.7  |
| 186 | Healthy | 0 | 22.4 | 11.8 |

|     |         |   |      |      |
|-----|---------|---|------|------|
| 187 | Healthy | 0 |      |      |
| 189 | Healthy | 0 | 39.7 | 18.2 |
| 190 | Healthy | 0 | 29.5 | 15.8 |
| 191 | Healthy | 0 | 18.7 | 14.6 |
| 192 | Healthy | 0 | 38.7 | 25.3 |
| 193 | Healthy | 0 | 35.1 | 20.9 |
| 194 | Healthy | 0 | 19.4 | 13.7 |
| 195 | Healthy | 0 | 36.3 | 21.1 |
| 196 | Healthy | 0 | 74.7 | 46.2 |
| 197 | Healthy | 0 | 32.9 | 14.6 |
| 198 | Healthy | 0 | 29.2 | 11.4 |
| 199 | Healthy | 0 | 29.2 | 21.1 |
| 200 | Healthy | 0 | 23.8 | 23.8 |
| 201 | Healthy | 0 | 26   | 11.9 |
| 202 | Healthy | 0 | 12.1 | 11   |
| 203 | Healthy | 0 | 35.5 | 15.3 |
| 204 | Healthy | 0 | 32.4 | 23.4 |
| 205 | Healthy | 0 | 47.6 | 31.3 |
| 206 | Healthy | 0 | 13.9 | 8.1  |
| 207 | Healthy | 0 | 40.9 | 28   |
| 208 | Healthy | 0 | 26.5 | 24.2 |
| 209 | Healthy | 0 | 34.4 | 21.7 |
| 210 | Healthy | 0 | 23.1 | 18.2 |
| 212 | Healthy | 0 | 35   | 30.3 |
| 213 | Healthy | 0 | 19   | 37.4 |
| 214 | Healthy | 0 | 24.8 | 19.4 |
| 215 | Healthy | 0 | 54.3 | 34.7 |
| 216 | Healthy | 0 | 39.7 | 22.8 |
| 217 | Healthy | 0 | 30.5 | 13.1 |
| 219 | Healthy | 0 | 18.5 | 19.3 |
| 220 | Healthy | 0 | 31.3 | 22.4 |
| 221 | Healthy | 0 | 28.2 | 15.1 |
| 222 | Healthy | 0 | 24.2 | 20.3 |
| 223 | Healthy | 0 | 46.3 | 25.9 |
| 224 | Healthy | 0 | 32.3 | 8.6  |
| 226 | Healthy | 0 | 31   | 22.8 |
| 227 | Healthy | 0 | 35.3 | 18.9 |
| 228 | Healthy | 0 | 31.3 | 21   |
| 229 | Healthy | 0 | 49.1 | 17.8 |
| 230 | Healthy | 0 | 27.5 | 19.5 |
| 232 | Healthy | 0 | 14.7 | 6.9  |
| 233 | Healthy | 0 | 22.4 | 23.9 |
| 234 | Healthy | 0 | 25.3 | 15.1 |
| 235 | Healthy | 0 | 39   | 26.6 |

|     |         |   |      |      |
|-----|---------|---|------|------|
| 237 | Healthy | 0 | 21   | 10   |
| 238 | Healthy | 0 | 30.4 | 10.3 |
| 239 | Healthy | 0 | 28.5 | 13.2 |
| 240 | Healthy | 0 | 17.6 | 7.2  |
| 241 | Healthy | 0 | 31.9 | 26.6 |
| 242 | Healthy | 0 | 20.3 | 9.6  |
| 243 | Healthy | 0 | 31.6 | 27.8 |
| 244 | Healthy | 0 | 38.1 | 20.6 |
| 245 | Healthy | 0 | 30.6 | 12.3 |
